# Supplementary figures and images for: Relationship between Glucose-6-Phosphate Dehydrogenase Deficiency, X-Chromosome Inactivation and Inflammatory Markers
Source: MDPI journal article supplement (doi:10.3390/antiox12020334), 2023-01-31

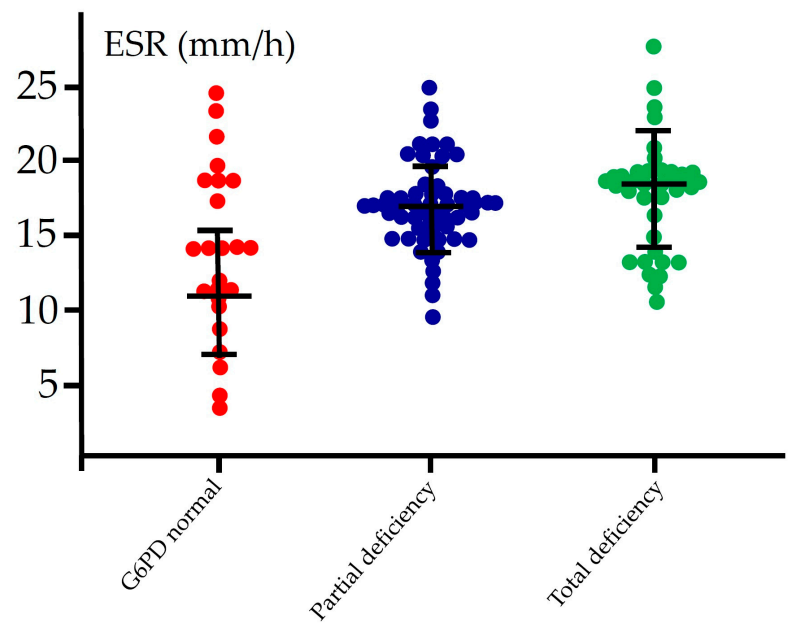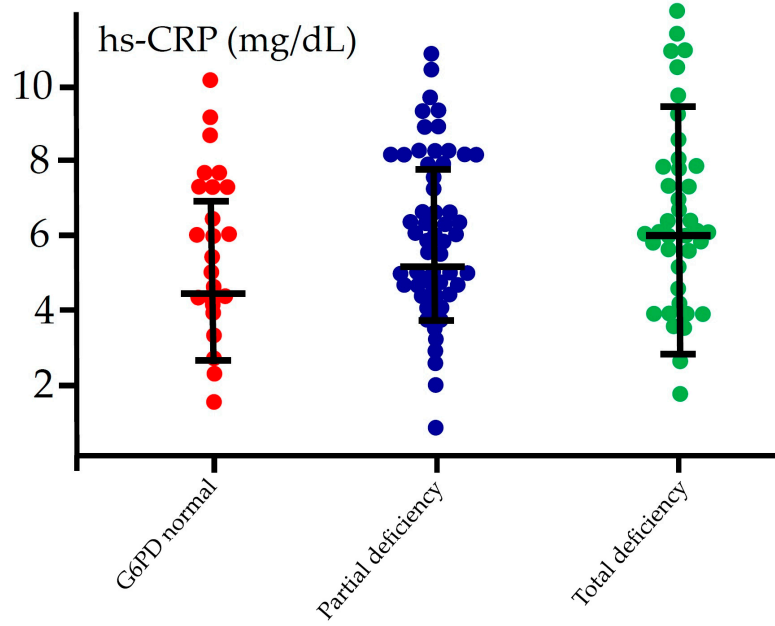

**Figure S1.** Univariate distribution of ESR and serum hs-CRP according to G6PD status.

Supplement: s1 [file s1]
